# Supplementary material
Source: Springer Nature journal article supplement (https://www.springermedizin.de/resource/supplementary/12874_2011_816_MOESM2_ESM.pdf/9432934)

**Assuming unequal variances**

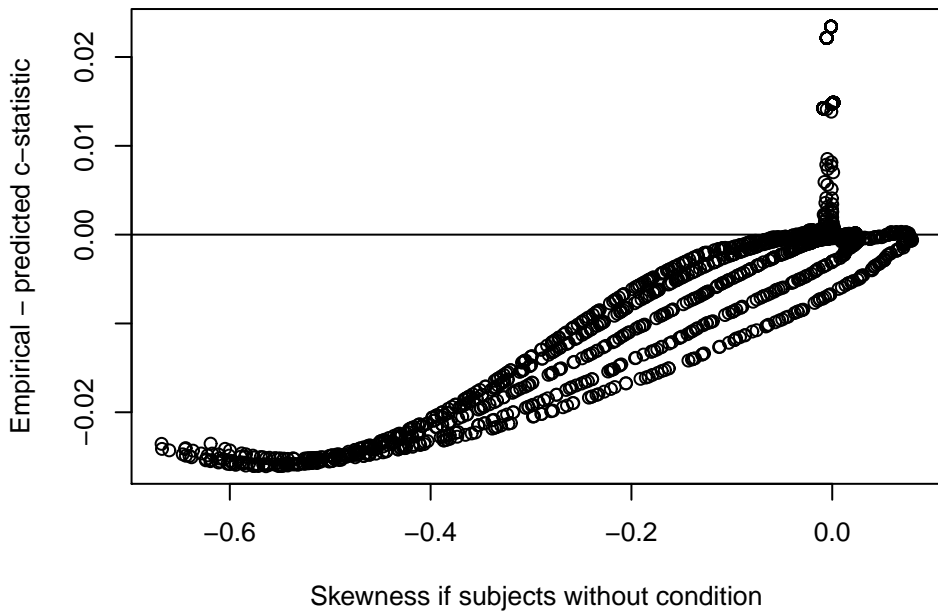

**Assuming unequal variances**

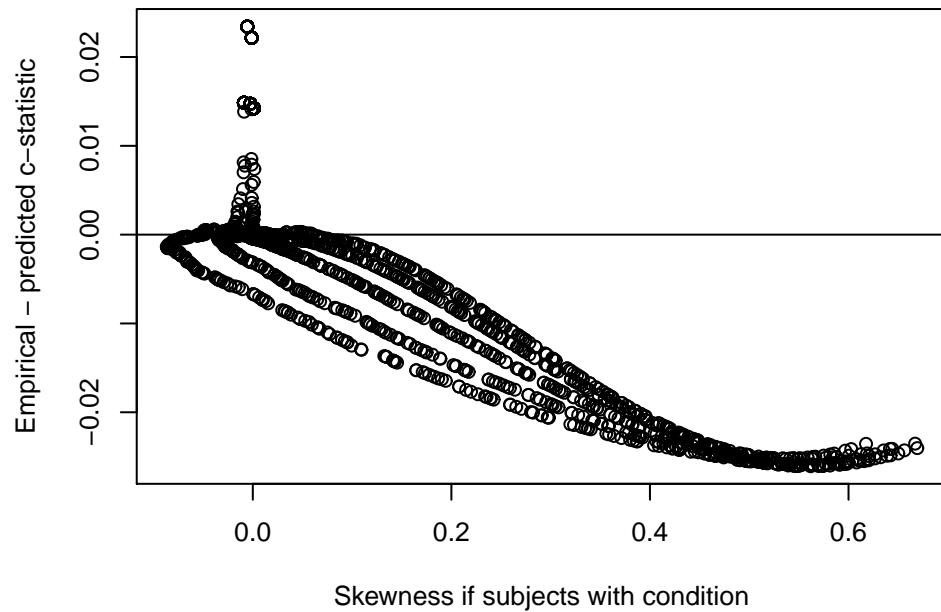

**Assuming equal variances**

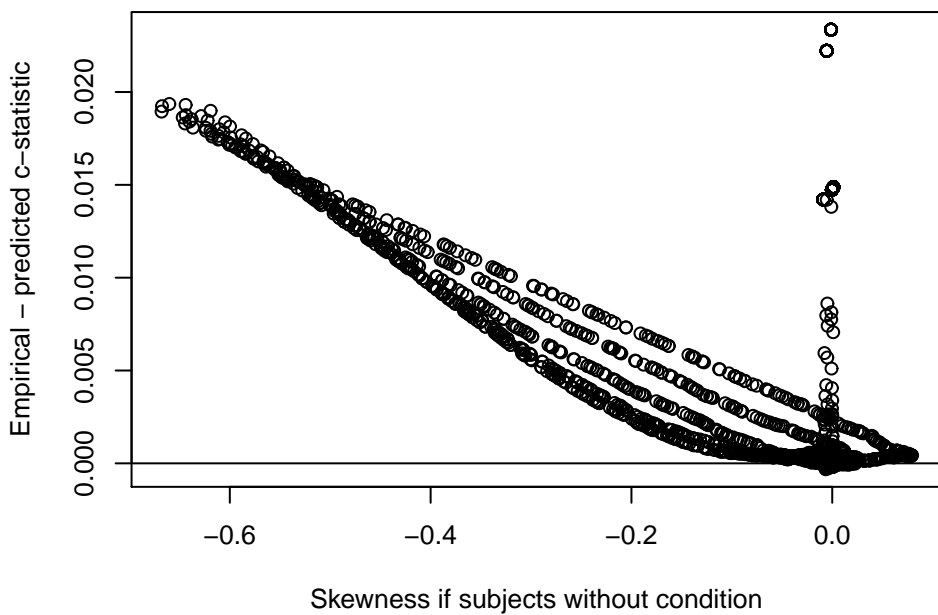

**Assuming equal variances**

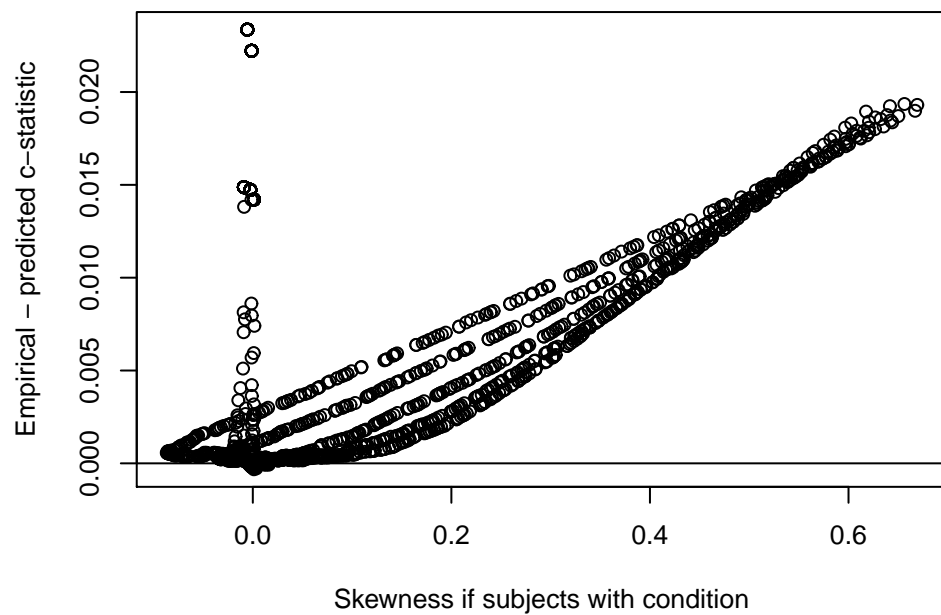

Supplement: MOESM2 [file 9432934]
